# Supplementary material for: Mechanistic Insights into the Allosteric Regulation of the Clr4 Protein Lysine Methyltransferase by Autoinhibition and Automethylation
Source: PubMed Central journal article supplement (PMC7700585; doi:10.3390/ijms21228832), 2020-11-22
Supplement: ijms-21-08832-s001.pdf [file ijms-21-08832-s001.pdf]

# Mechanistic Insights into the Allosteric Regulation of the Clr4 Protein Lysine Methyltransferase by Autoinhibition and Automethylation

Mina S. Khella, Alexander Bröhm, Sara Weirich and Albert Jeltsch

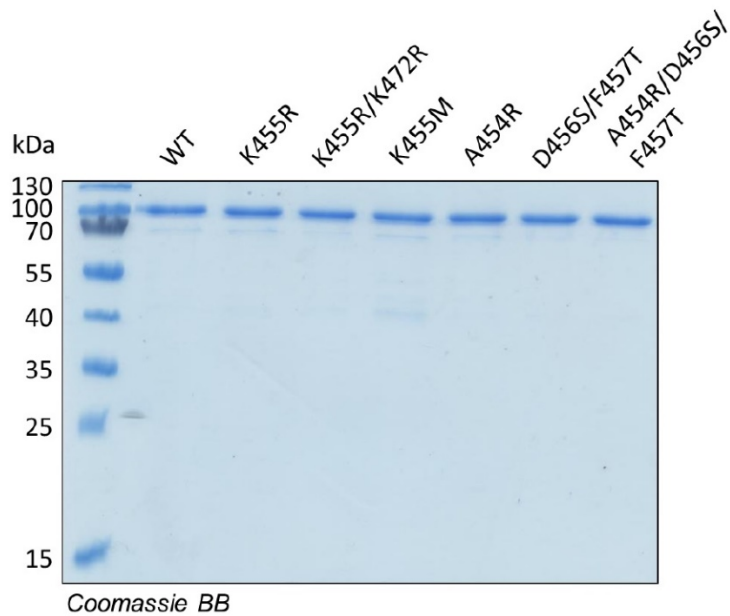

**Figure S1.** Coomassie BB stained SDS gel of the purified Clr4 WT and mutants showing high purity and comparable concentrations of the purified proteins.

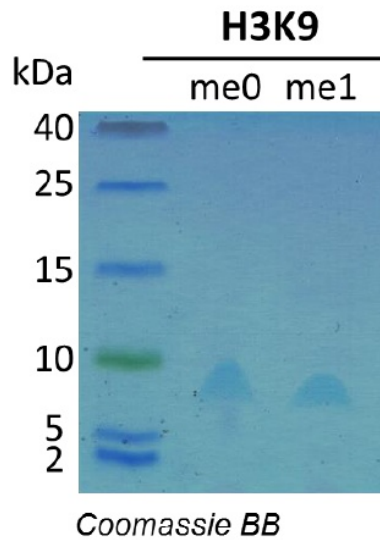

**Figure S2.** Coomassie BB stained Tricine SDS gel of histone peptides H3K9me0 and H3K9me1.

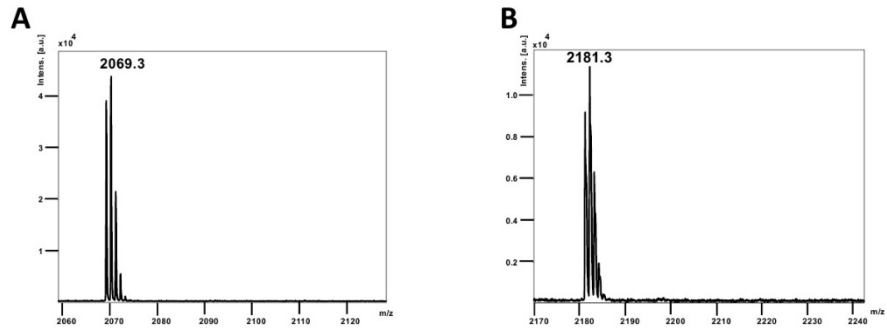

**Figure S3.** Mass spectra of the H3K9me0 (A) and H3K9me1 (B) histone peptides without enzyme incubation.

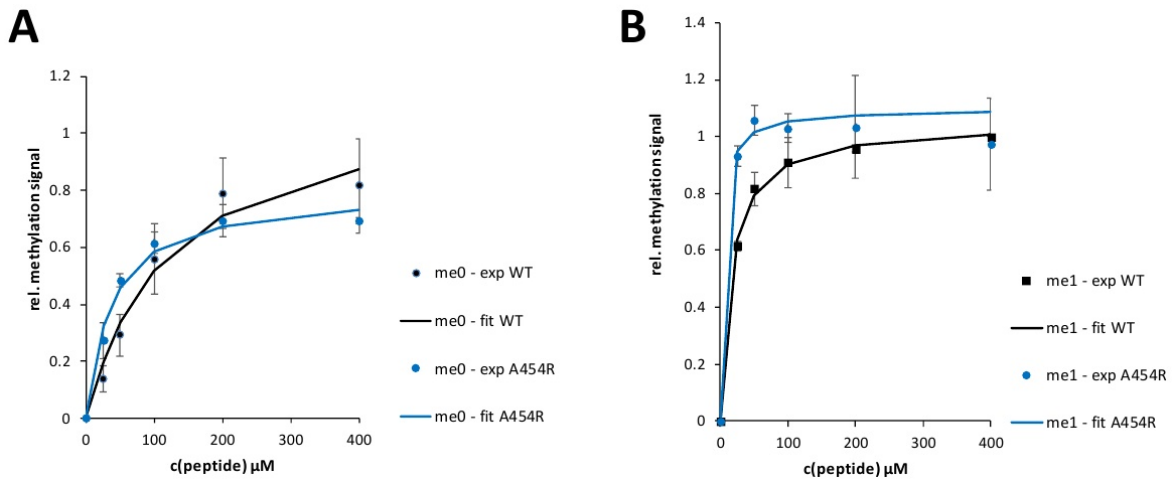

**Figure S4.** Comparison of the methyltransferase activity of Clr4 A454R and Clr4 WT at different concentrations of the H3K9me0 (A) or H3K9me1 peptide (B) as substrate.

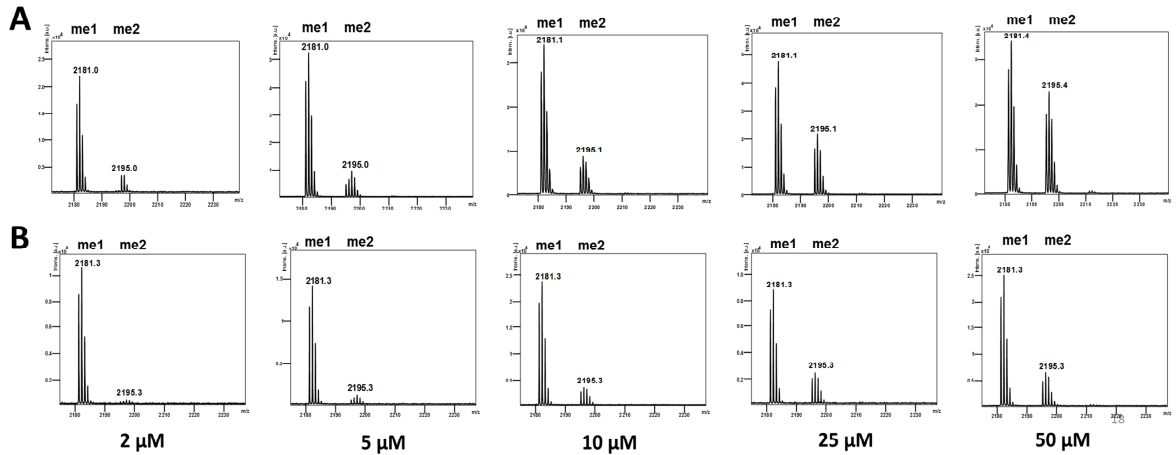

**Figure S5.** MALDI-TOF mass spectrometry methylation analysis of Clr4 WT (A) and the automethylation deficient mutant K455R/K472R (B) at different AdoMet concentrations (indicated below the panels). All samples were incubated for 3 h.

**Table S1.** Z-statistics derived *p*-values of differences in automethylation and methyltransferase activity levels of different Clr4 mutants shown in Figure 2 compared to wild type. All values are mean  $\pm$  S.D. *P*-values  $< 0.05$  were considered as significant. n.s.—not significant.

| Clr4 Mutant       | Automethylation Level<br>(Relative Value) | <i>p</i> -Value       | Methyltransferase Activity<br>(Relative Value) | <i>p</i> -Value       |
|-------------------|-------------------------------------------|-----------------------|------------------------------------------------|-----------------------|
| A454R             | 3.4 $\pm$ 1.05                            | 0.012                 | 1.9 $\pm$ 0.33                                 | 0.004                 |
| D456S/F457T       | 1.2 $\pm$ 0.33                            | n.s.                  | 1.2 $\pm$ 0.14                                 | n.s.                  |
| A454R/D456S/F457T | 2.7 $\pm$ 0.66                            | 0.006                 | 1.7 $\pm$ 0.02                                 | $<10^{-90}$           |
| K455R             | 0.7 $\pm$ 0.08                            | $6.07 \times 10^{-5}$ | 1.1 $\pm$ 0.008                                | $3.3 \times 10^{-55}$ |
| K455R/K472R       | 0.46 $\pm$ 0.15                           | 0.00015               | 0.91 $\pm$ 0.08                                | n.s.                  |
| K455M             | 0.23 $\pm$ 0.05                           | $<10^{-90}$           | 0.7 $\pm$ 0.09                                 | 0.0004                |
